# Supplementary material for: Caging of plumbagin on silver nanoparticles imparts selectivity and sensitivity to plumbagin for targeted cancer cell apoptosis
Source: Royal Society of Chemistry journal article supplement (doi:10.1039/c4mt00165f), 2014-01-01
Supplement: c4mt00165f8.pdf [file c4mt00165f8.pdf]

**Supplementary Table 1**

|                          | A431 (Gated Percentage) |              |                   |             | HaCaT (Gated Percentage) |             |                   |             |
|--------------------------|-------------------------|--------------|-------------------|-------------|--------------------------|-------------|-------------------|-------------|
|                          | UL                      | UR           | LL<br>(Viability) | LR          | UL                       | UR          | LL<br>(Viability) | LR          |
| <b>Unstained Control</b> | <b>0.03</b>             | <b>0.10</b>  | <b>99.86</b>      | <b>0.01</b> | <b>0.04</b>              | <b>0.39</b> | <b>99.57</b>      | <b>0.00</b> |
| <b>Annexin Control</b>   | <b>0.02</b>             | <b>0.21</b>  | <b>99.74</b>      | <b>0.03</b> | <b>0.01</b>              | <b>0.38</b> | <b>98.30</b>      | <b>1.31</b> |
| <b>PI Control</b>        | <b>4.64</b>             | <b>0.22</b>  | <b>95.11</b>      | <b>0.03</b> | <b>2.99</b>              | <b>0.29</b> | <b>96.73</b>      | <b>0.00</b> |
| <b>Untreated Control</b> | <b>5.44</b>             | <b>0.38</b>  | <b>94.17</b>      | <b>0.00</b> | <b>19.68</b>             | <b>0.10</b> | <b>80.23</b>      | <b>0.00</b> |
| <b>P1</b>                | <b>2.29</b>             | <b>4.29</b>  | <b>93.08</b>      | <b>0.34</b> | <b>18.73</b>             | <b>0.35</b> | <b>80.93</b>      | <b>0.00</b> |
| <b>P2</b>                | <b>0.98</b>             | <b>5.82</b>  | <b>89.08</b>      | <b>4.12</b> | <b>18.73</b>             | <b>0.76</b> | <b>80.47</b>      | <b>0.05</b> |
| <b>PN1</b>               | <b>5.77</b>             | <b>17.61</b> | <b>72.91</b>      | <b>3.71</b> | <b>18.60</b>             | <b>0.21</b> | <b>81.18</b>      | <b>0.01</b> |
| <b>PN2</b>               | <b>40.65</b>            | <b>6.57</b>  | <b>51.65</b>      | <b>1.12</b> | <b>19.82</b>             | <b>0.25</b> | <b>79.89</b>      | <b>0.04</b> |

**Supplementary Table 1** Flow cytometric quantification of apoptotic and viable cells on treatment with plumbagin and plumabagin caged silver nanoparticle. P1, P2 represents the A431 and HaCaT cells treated with 2.5  $\mu$ M and 5  $\mu$ M concentration of plumbagin respectively. PN1 and PN2 illustrated that the both A431 and HaCaT cells treated with 2.5  $\mu$ M and 5  $\mu$ M concentration of plumbagin caged silver nanoparticle respectively

UL-Necrotic; UR-Late Apoptotic; LL-Normal (Viable) cells; LR-Early apoptotic.
