# Supplementary figures and images for: Caging of plumbagin on silver nanoparticles imparts selectivity and sensitivity to plumbagin for targeted cancer cell apoptosis
Source: Royal Society of Chemistry journal article supplement (doi:10.1039/c4mt00165f), 2014-01-01

## Supplementary Figure 1

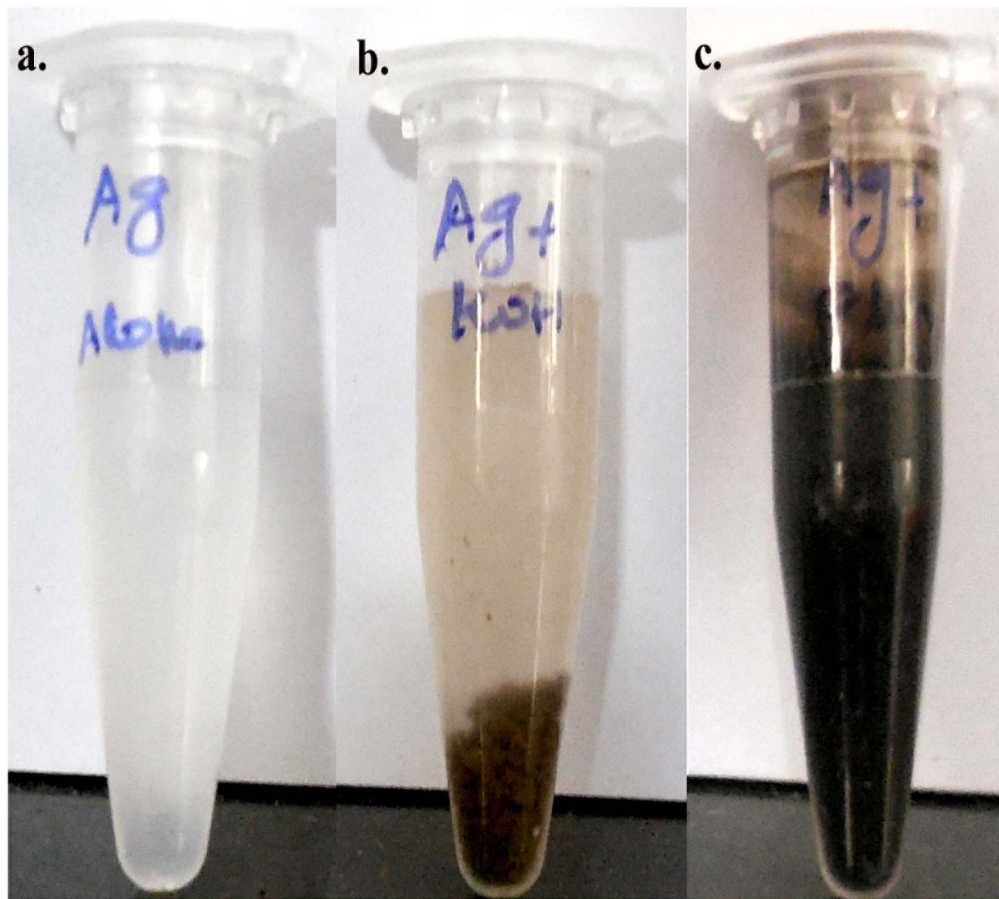

Supplement: c4mt00165f2.pdf [file c4mt00165f2.pdf]

# Supplementary Figure 5

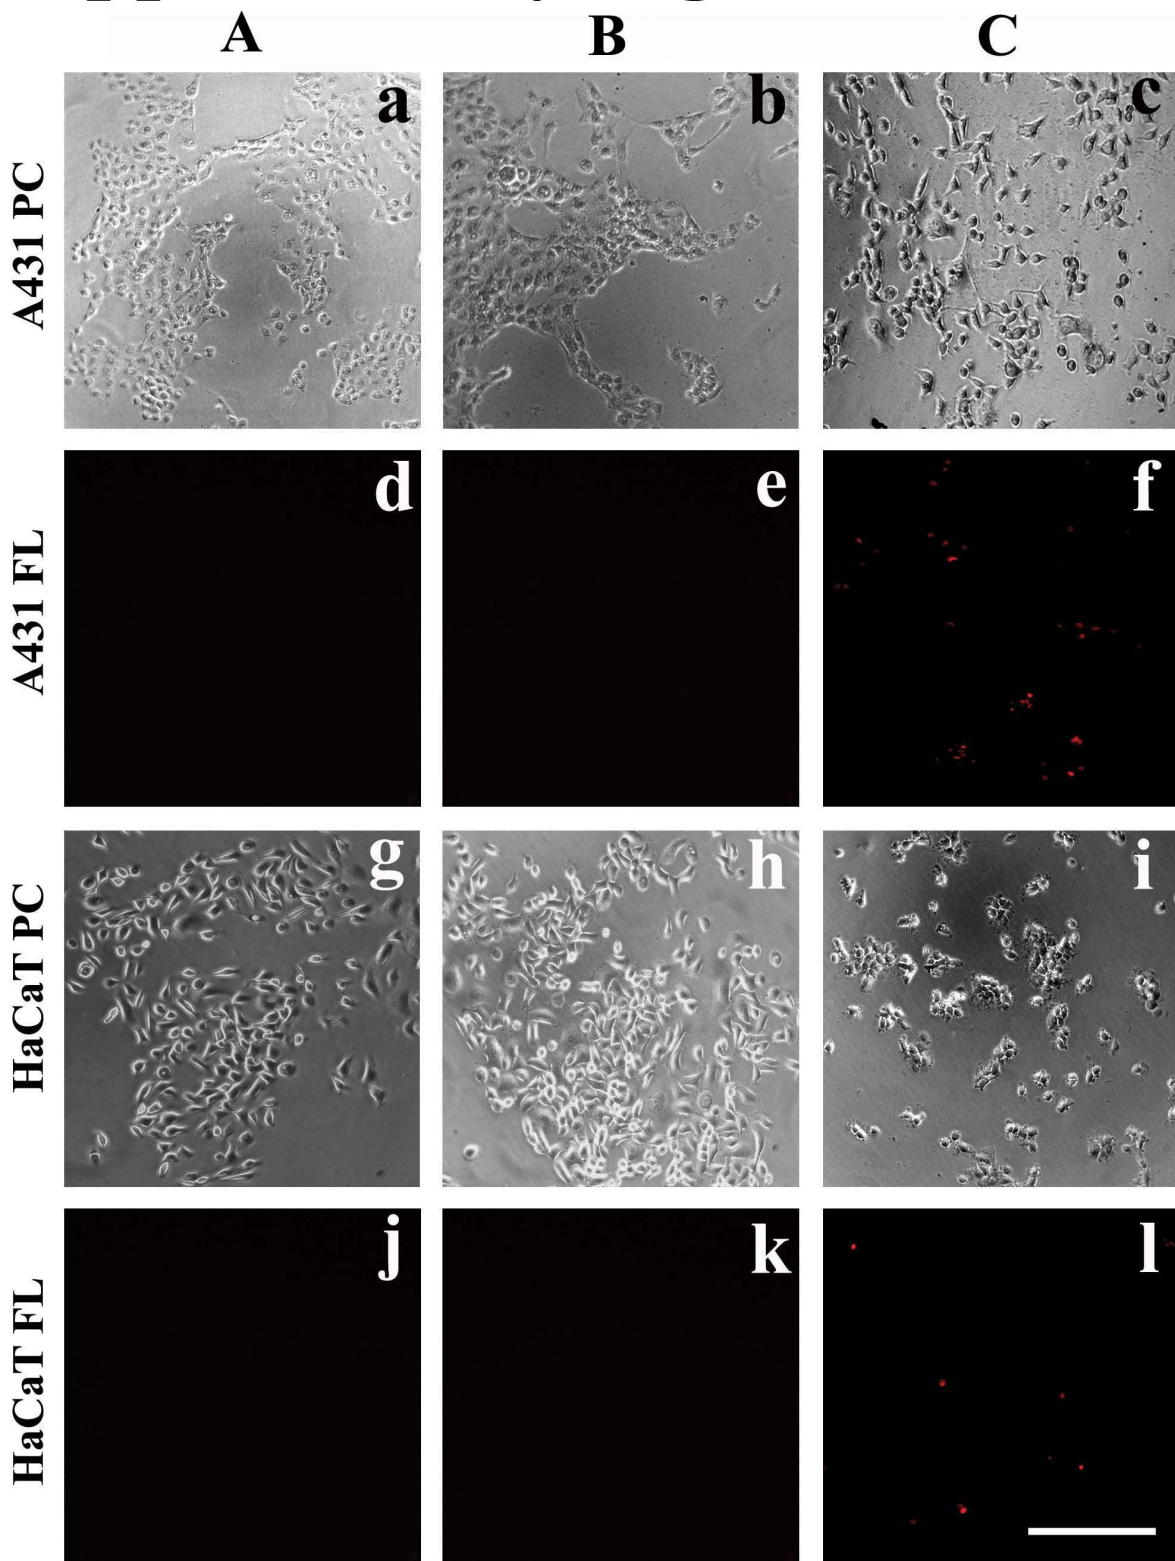

Supplement: c4mt00165f6.pdf [file c4mt00165f6.pdf]

## Supplementary Figure 6

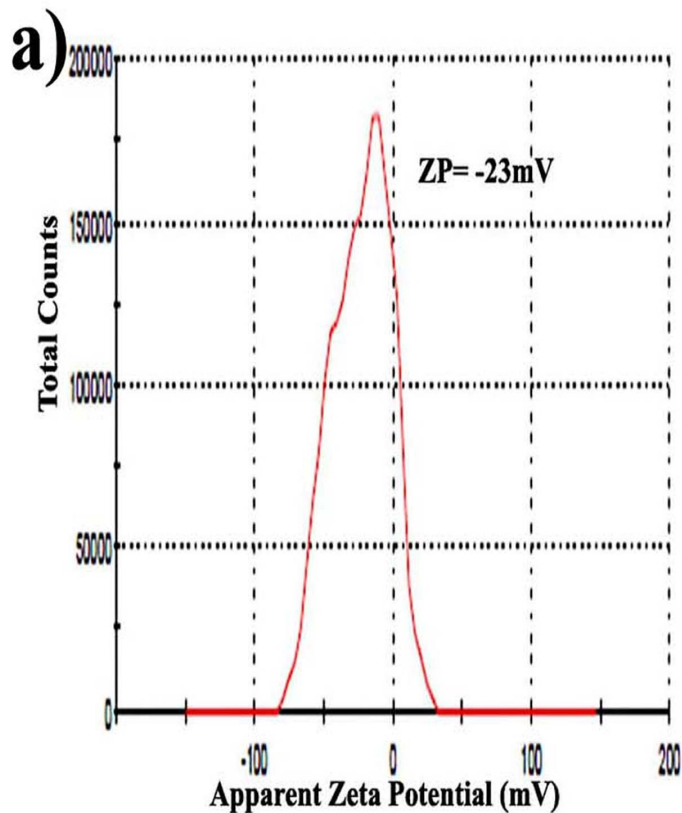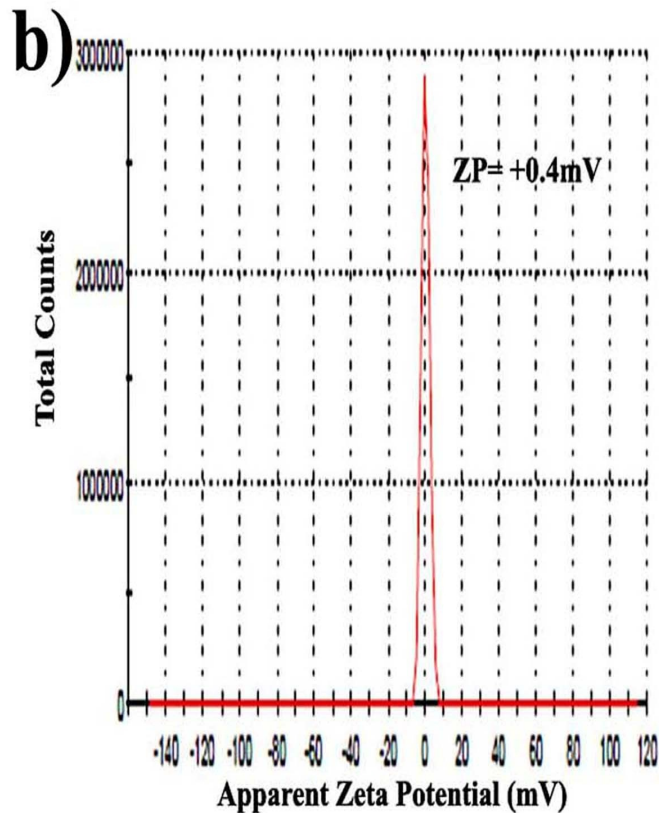

Supplement: c4mt00165f7.pdf [file c4mt00165f7.pdf]
